# Supplementary material for: Tuning the Catalytic Water Oxidation Activity through Structural Modifications of High-Nuclearity Mn-oxo Clusters [Mn18M] (M = Sr2+, Mn2+)
Source: MDPI journal article supplement (doi:10.3390/w13152042), 2021-07-27
Supplement: s1 [file s1]

Archive with 1 entries (1 files):
- water-1293846-supplementary.pdf
