# Supplementary material for: Tuning the Catalytic Water Oxidation Activity through Structural Modifications of High-Nuclearity Mn-oxo Clusters [Mn18M] (M = Sr2+, Mn2+)
Source: MDPI journal article supplement (doi:10.3390/w13152042), 2021-07-27
Supplement: s1 [file s1 › water-1293846-supplementary.pdf]

## Supplementary Information

# Tuning the Catalytic Water Oxidation Activity through Structural Modifications of High-Nuclearity Mn-oxo Clusters [Mn<sub>18</sub>M] (M = Sr<sup>2+</sup>, Mn<sup>2+</sup>)

Joaquín Soriano-López \*, Rory Elliott, Amal C. Kathalikkattil, Ayuk M. Ako and Wolfgang Schmitt \*

School of Chemistry & SFI AMBER Centre, Trinity College, University of Dublin, 999014 Dublin, Ireland; relliot@tcd.ie (R.E.); amalcherian@gmail.com (A.C.K.); akomana12@gmail.com (A.M.A.)

\* Correspondence: sorianoj@tcd.ie (J.S.-L. ); schmittw@tcd.ie (W.S.)

| Index                                                                                                                                                                                                                                                                                                                                | Page |
|--------------------------------------------------------------------------------------------------------------------------------------------------------------------------------------------------------------------------------------------------------------------------------------------------------------------------------------|------|
| <b>Figure S1.</b> FT-IR spectra of the freshly prepared <b>Mn<sub>18</sub>Sr</b> (a) and <b>Mn<sub>19</sub></b> (b) complexes.                                                                                                                                                                                                       | S2   |
| <b>Figure S2.</b> Comparison of the Raman spectra obtained for the freshly developed <b>Mn<sub>18</sub>Sr</b> (a) and <b>Mn<sub>19</sub></b> (c) complexes, and that for the recovered decomposition products identified as a catalytically inactive amorphous manganese-potassium carbonate-phosphate species (b,d).                | S3   |
| <b>Figure S3.</b> Calculation of the onset overpotential employing 30% <b>Mn<sub>18</sub>Sr</b> /CP working electrodes. The onset overpotential was estimated from the intersection point between the tangent line of the Faradaic current at 1 mA cm <sup>-2</sup> and the extrapolated line arising from the non-Faradaic current. | S4   |
| <b>Figure S4.</b> Long-term chronopotentiometry measurements at applied current densities of (a) 1 mA cm <sup>-2</sup> (red) and (b) 10 mA cm <sup>-2</sup> (orange). The experiments were performed in an H-cell using a 50 mM KPi aqueous buffer at pH = 7.2 using KNO <sub>3</sub> (1 M) as electrolyte.                          | S5   |

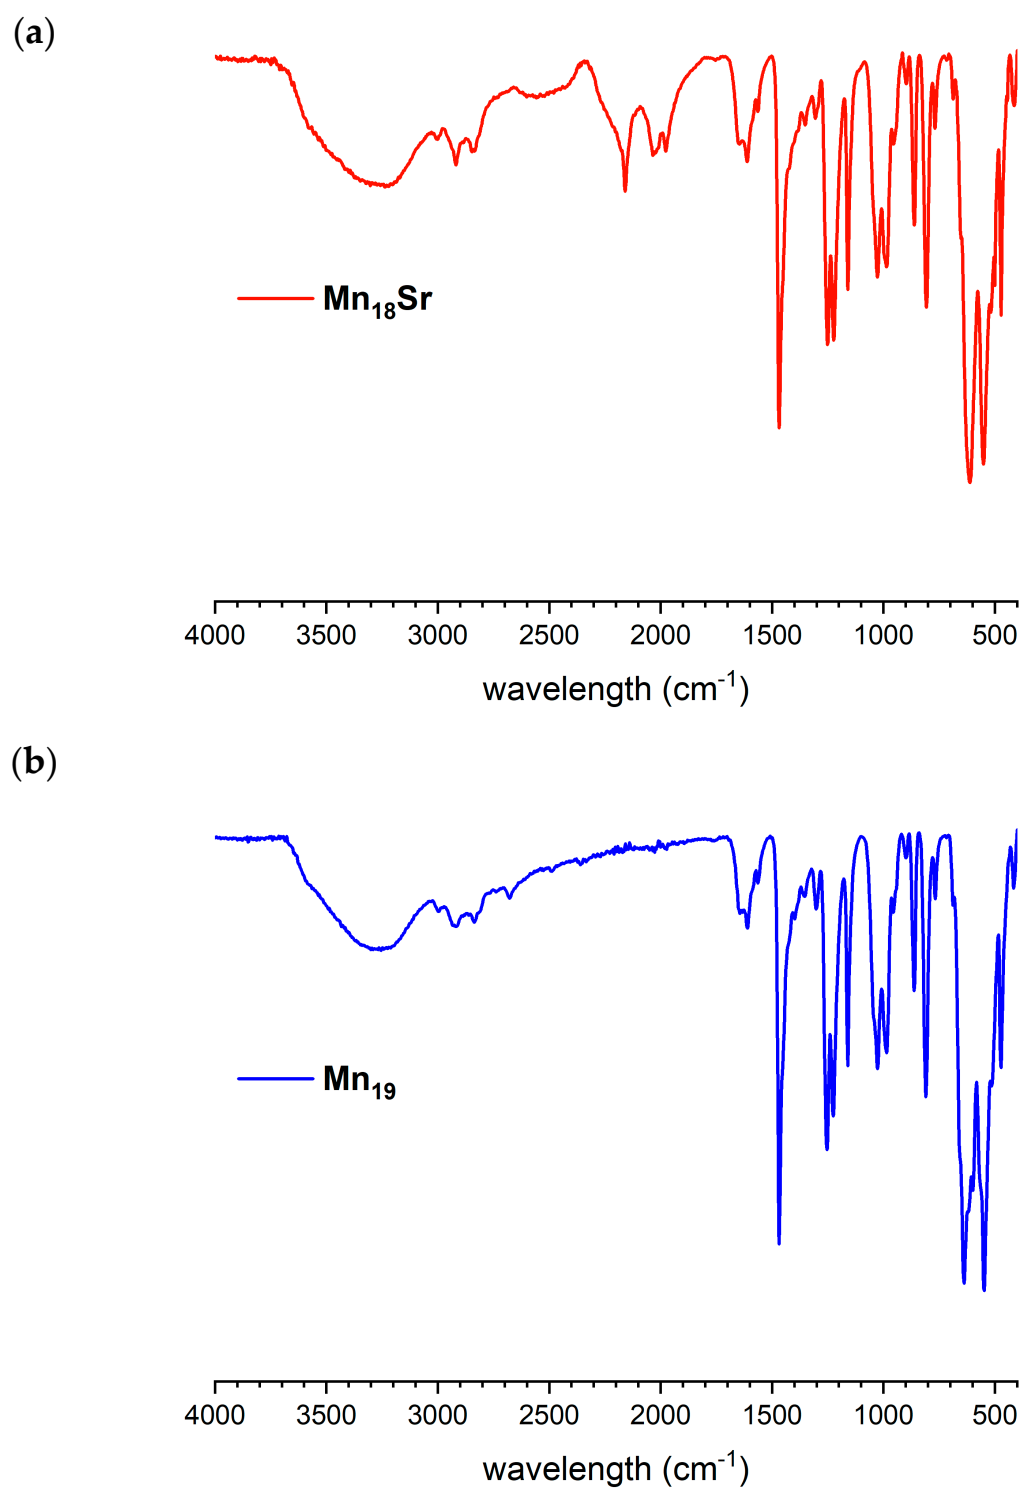

**Figure S1.** FT-IR spectra of the freshly prepared  $\text{Mn}_{18}\text{Sr}$  (a) and  $\text{Mn}_{19}$  (b) complexes.

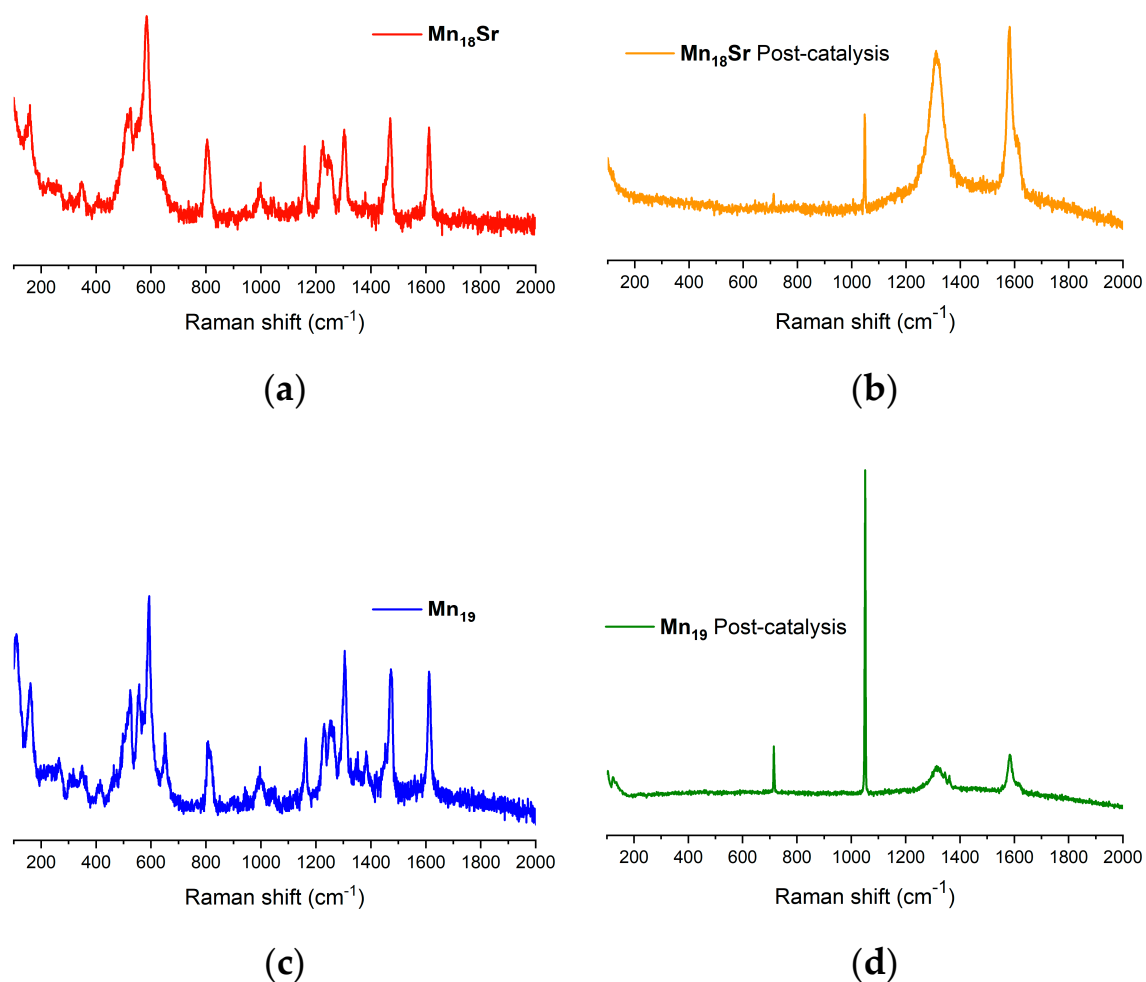

**Figure S2.** Comparison of the Raman spectra obtained for the freshly developed  $\text{Mn}_{18}\text{Sr}$  (a) and  $\text{Mn}_{19}$  (c) complexes, and that for the recovered decomposition products identified as a catalytically inactive amorphous manganese-potassium carbonate-phosphate species (b,d).

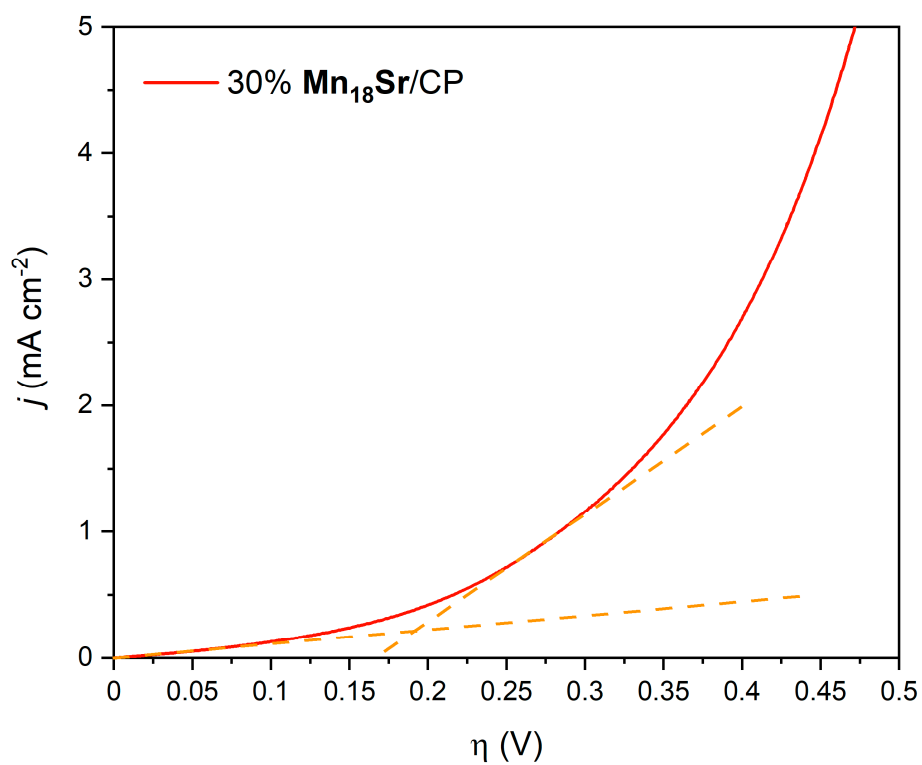

**Figure S3.** Calculation of the onset overpotential employing 30% **Mn<sub>18</sub>Sr**/CP working electrodes. The onset overpotential was estimated from the intersection point between the tangent line of the Faradaic current at 1 mA cm<sup>-2</sup> and the extrapolated line arising from the non-Faradaic current.

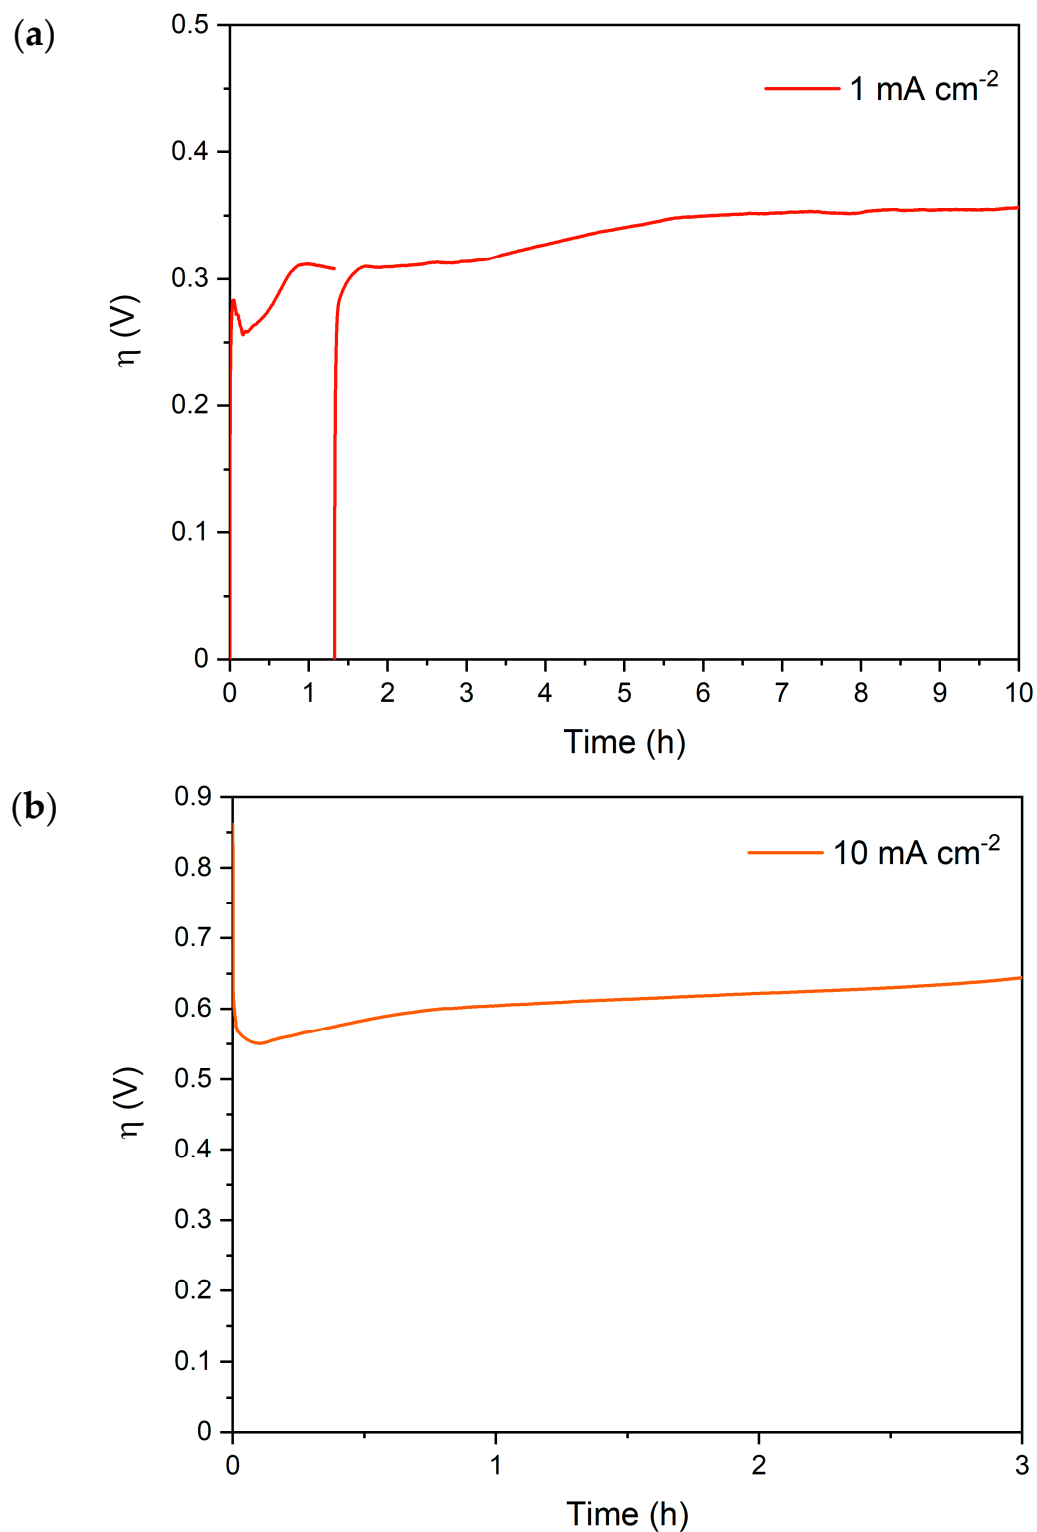

**Figure S4.** Long-term chronopotentiometry measurements at applied current densities of (a)  $1 \text{ mA cm}^{-2}$  (red) and (b)  $10 \text{ mA cm}^{-2}$  (orange). The experiments were performed in an H-cell using a 50 mM  $\text{KPi}$  aqueous buffer at  $\text{pH} = 7.2$  using  $\text{KNO}_3$  (1 M) as electrolyte.
